# Supplementary material for: Ratiometric and reusable fluorescent nanoparticles for Zn2+ and H2PO4− detection in aqueous solution and living cells
Source: Royal Society of Chemistry journal article supplement (doi:10.1039/c0jm01925a), 2010-01-01
Supplement: c0jm01925a.pdf [file c0jm01925a.pdf]

## Supplementary Information

### Ratiometric and Reusable Fluorescent Nanoparticles for $\text{Zn}^{2+}$ and $\text{H}_2\text{PO}_4^-$ Detection in Aqueous Solution and Living Cell

Chunsheng He, Weiping Zhu\*, Yufang Xu, Ye Zhong, Juan Zhou and Xuhong Qian\*<sup>a</sup>

<sup>a</sup> Shanghai Key Laboratory of Chemical Biology, School of Pharmacy

East China University of Science and Technology, 130 Meilong Road, Shanghai 200237 (PR

China). Fax: (+86) 21-64252603; E-mail: wpzhu@ecust.edu.cn; xhqian@ecust.edu.cn

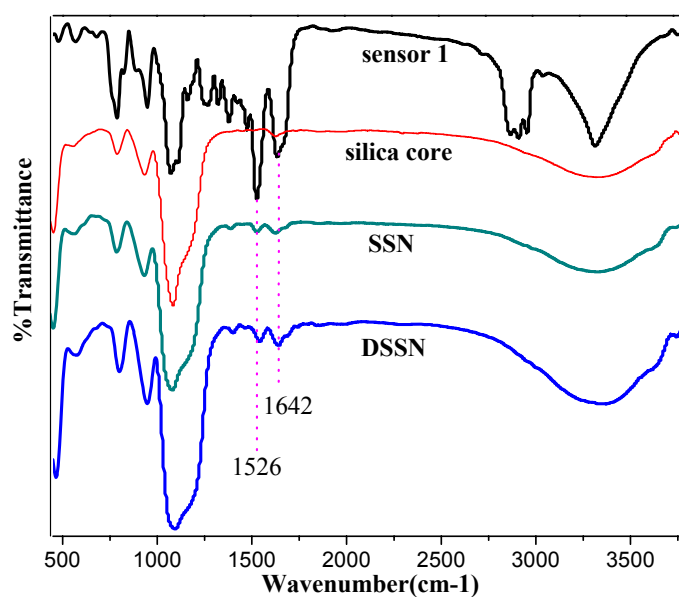

Fig. S1 The FT-IR spectra of sensor 1, silica core, SSN, DSSN.

The bands observed in the wavenumber 1642, 1526 cm<sup>-1</sup> are attributed to the vibrations of -NH-CO-, quinoline of sensor 1 respectively.

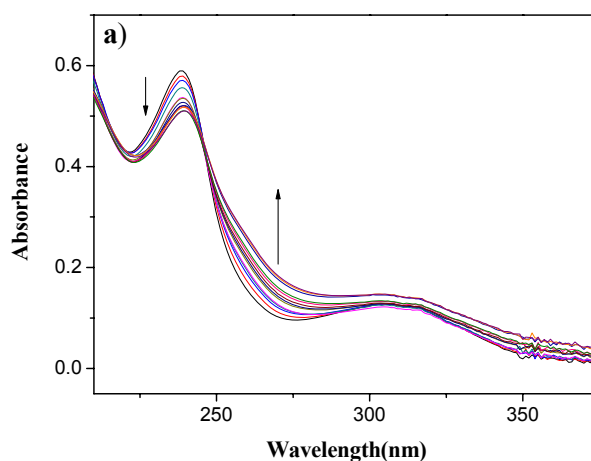

Fig. S2 Absorption spectra of a solution of SSN in the presence of increasing  $\text{Zn}^{2+}$  concentrations (0–1.0 mM) in tris-HCl (0.01 M) solution (water, pH=7.10). Conditions: [sensor-1] =  $3.1 \times 10^{-5}$  M, 25 °C.

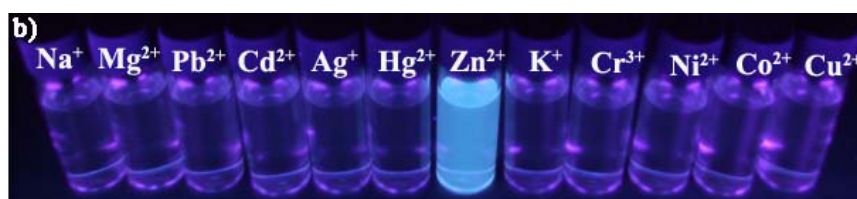

Fig. S3 Fluorescence response of SSN in tris-HCl (0.01 M) solution (water, pH=7.10) with different metal ions. Images were taken under UV irradiation.

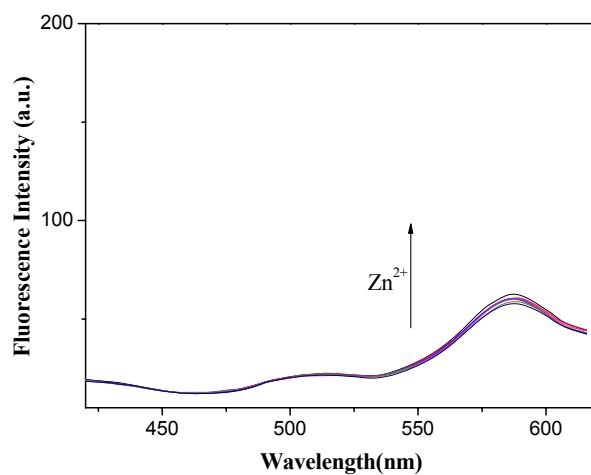

Fig. S4 Emission spectra of a solution of dye-2-rich core and pure silica shell fluorescent silica

nanoparticles (**DSN**) in the presence of increasing  $\text{Zn}^{2+}$  concentrations (0–1.0 mM) in tris-HCl (0.01 M) solution (water, pH=7.10). Conditions:  $\lambda_{\text{ex}}$ =320 nm,  $\lambda_{\text{em}}$ =591 nm, 25 °C.

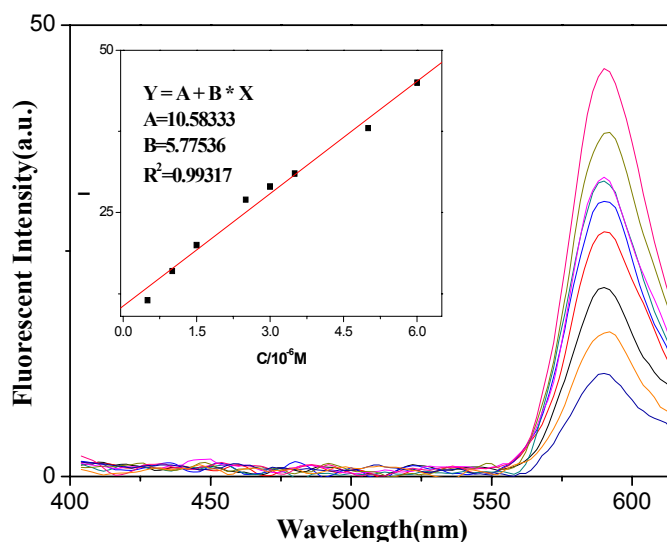

Fig.S5 Emission spectra of different concentration (0~10  $\mu\text{M}$ ) of dye-2 in tris-HCl (0.01 M) solution. Inset: Standard curve of different concentration (0~10  $\mu\text{M}$ ) of dye-2 in tris-HCl (0.01 M) solution. Conditions:  $\lambda_{\text{ex}}$ =320 nm,  $\lambda_{\text{em}}$ =591 nm, 25 °C.

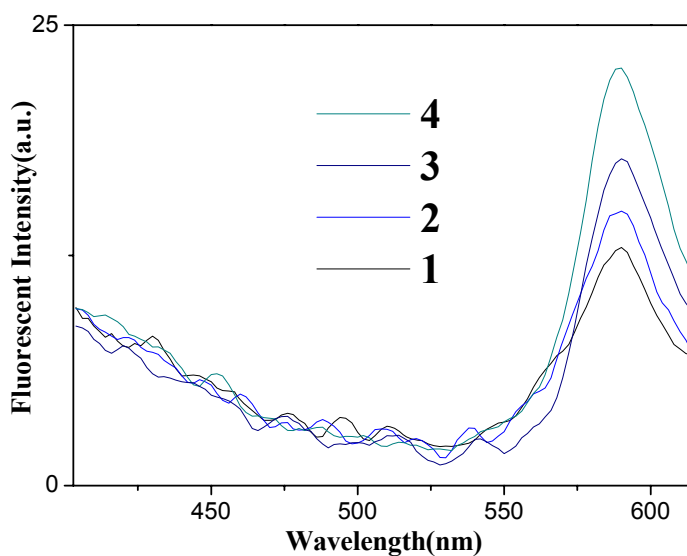

Fig. S6 Emission spectra of a solution of different concentration of **DSSN** in tris-HCl (0.01 M) solution (water, pH=7.10). Conditions:  $\lambda_{\text{ex}}$ =320 nm,  $\lambda_{\text{em}}$ =591 nm, 25 °C.

Table S1 The ratio of sensor-1 to Dye-2 combined in the **DSSN**<sup>a</sup>

|   | Sensor <b>1</b><br>(10 <sup>-6</sup> M) | Dye <b>2</b><br>(10 <sup>-6</sup> M) | Ratio of Sensor <b>1</b><br>to Dye <b>2</b> |
|---|-----------------------------------------|--------------------------------------|---------------------------------------------|
| 1 | 25                                      | 0.397                                | 62.9                                        |
| 2 | 47                                      | 0.752                                | 62.5                                        |
| 3 | 52                                      | 0.847                                | 61.4                                        |
| 4 | 130                                     | 2.09                                 | 62.2                                        |

<sup>a</sup> The concentration of sensor-1 (Fig. S6, Table 1: **1**, **2**, **3,4**) was evaluated from their absorbance using the  $\epsilon$  values of the corresponding compound in aqueous solution (sensor-1:  $\lambda=243$  nm,  $\epsilon=1.73 \times 10^4$  M<sup>-1</sup> cm<sup>-1</sup>). The dye-2 was calculated by the standard curve of dye-2 (Fig. S5: Inset, Fig. S6).

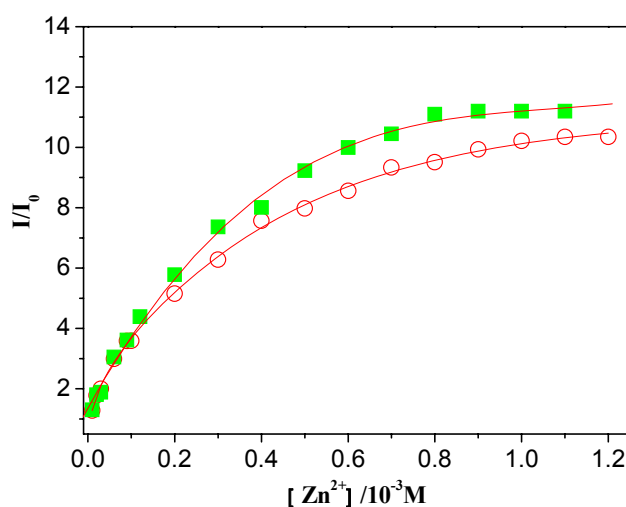

Fig.S7 Fluorescence response of [SSN:■] and [DSSN:○] as a function of Zn<sup>2+</sup> (0~1.0 mM). Conditions: [sensor-1] =  $3.1 \times 10^{-5}$  M,  $\lambda_{\text{ex}}$ =320 nm,  $\lambda_{\text{em}}$ =482 nm, 25 °C.

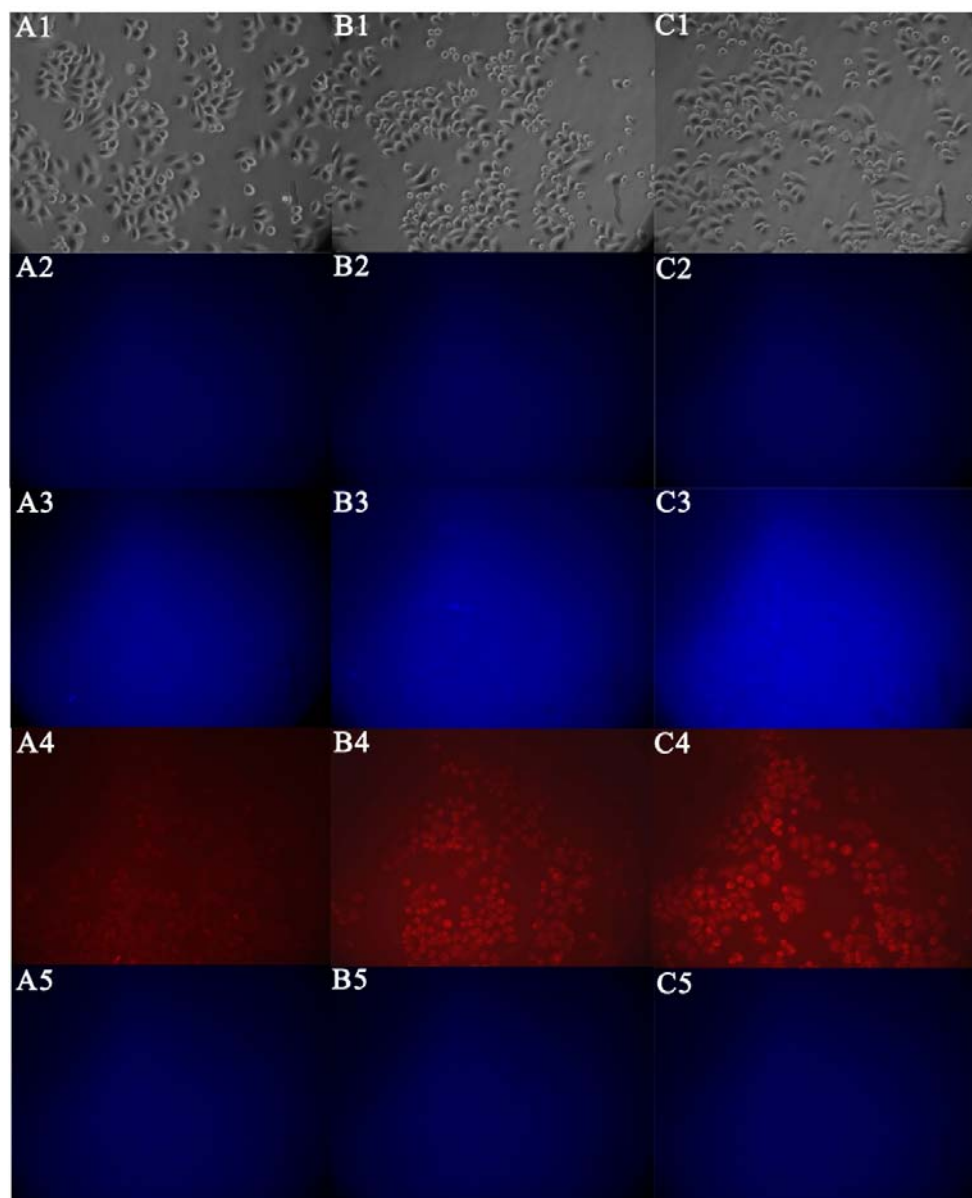

Fig. S8 Fluorescence images of **DSSN** ( $[\text{sensor-1}] = 4.0 \times 10^{-5} \text{ M}$ ) induced by intracellular  $\text{Zn}^{2+}$  in HeLa cells. (1) Bright-field transmission image of HeLa Cells incubated with **DSSN** and  $\text{Zn}^{2+}$ . (2) Fluorescence image of HeLa cells incubated with **DSSN**. (3) Fluorescence image of HeLa cells and incubated with **DSSN** for 30 min, washed three times, and then further incubated with  $\text{Zn}^{2+}$  at different concentrations (collected at 430~510 nm (blue)). (4) Fluorescence image of HeLa cells and incubated with **DSSN** for 30 min, washed three times, and then further incubated with  $\text{Zn}^{2+}$  at different concentrations (collected at 570~650 nm (red)); (5) Fluorescence image of HeLa cells stained with **DSSN** and  $\text{Zn}^{2+}$  further incubated with EDTA (20 mM) for 25 min.  $\text{Zn}^{2+}$  concentrations (A:  $4 \times 10^{-5} \text{ M}$ ; B:  $4 \times 10^{-4} \text{ M}$ ; C:  $7.5 \times 10^{-4} \text{ M}$ )

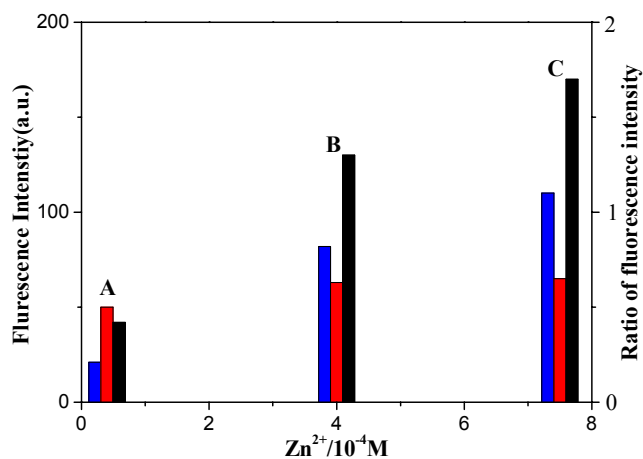

Fig. S9 ImageJ software gave an average emission value of fluorescence images. Blue bar: the mean fluorescent intensity under 430~510 nm (Fig. S8: A3, B3, C3); Red bar: the mean fluorescent intensity under 570~650 nm (Fig. S8: A4, B4, C4). Black bar: the ratio of blue bar to red bar.
